# Supplementary material for: Optimal and strategic delivery of CO2 for Chlorella minutissima-mediated valorization of domestic wastewater with concomitant production of biomass and biofuel
Source: Royal Society of Chemistry journal article supplement (doi:10.1039/d0se00296h), 2020-01-01
Supplement: d0se00296h1.pdf [file d0se00296h1.pdf]

**Table S1**

Elemental analysis of DOCs by SEM-EDX (Scanning Electron Microscopy – Energy Dispersive X-ray Spectroscopy)

| Deoiled<br>cakes | Macro elements |       |        |      | Micro elements |    |   |    |    |   |    |    |    |    |    |    |    |    |
|------------------|----------------|-------|--------|------|----------------|----|---|----|----|---|----|----|----|----|----|----|----|----|
|                  | N<br>%         | C %   | H<br>% | S %  | Cr             | Mn | K | Mg | Zn | P | Fe | Co | Ni | Ca | Si | Cu | Al | Cl |
| Mustard          | 6.00           | 45.39 | 6.93   | 1.17 | •              | •  | • | •  | •  | • | •  | •  | •  | •  | X  | •  | X  | X  |

• Available

X Not available
